# Supplementary material for: Visualizing the Contribution of Keratin-14+ Limbal Epithelial Precursors in Corneal Wound Healing
Source: PubMed Central journal article supplement — Stem Cell Reports. 2018 Dec 13;12(1):14–28. doi: 10.1016/j.stemcr.2018.11.014 (PMC6335450; doi:10.1016/j.stemcr.2018.11.014), 2018-12-13
Supplement: mmc1.pdf [file mmc1.pdf]

**Stem Cell Reports, Volume 12**

**Supplemental Information**

**Visualizing the Contribution of Keratin-14<sup>+</sup> Limbal Epithelial Precursors  
in Corneal Wound Healing**

**Mijeong Park, Alexander Richardson, Elvis Pandzic, Erwin P. Lobo, Renee Whan, Stephanie L. Watson, J. Guy Lyons, Denis Wakefield, and Nick Di Girolamo**

1 Supplementary Figures and Text

2 Figure S1

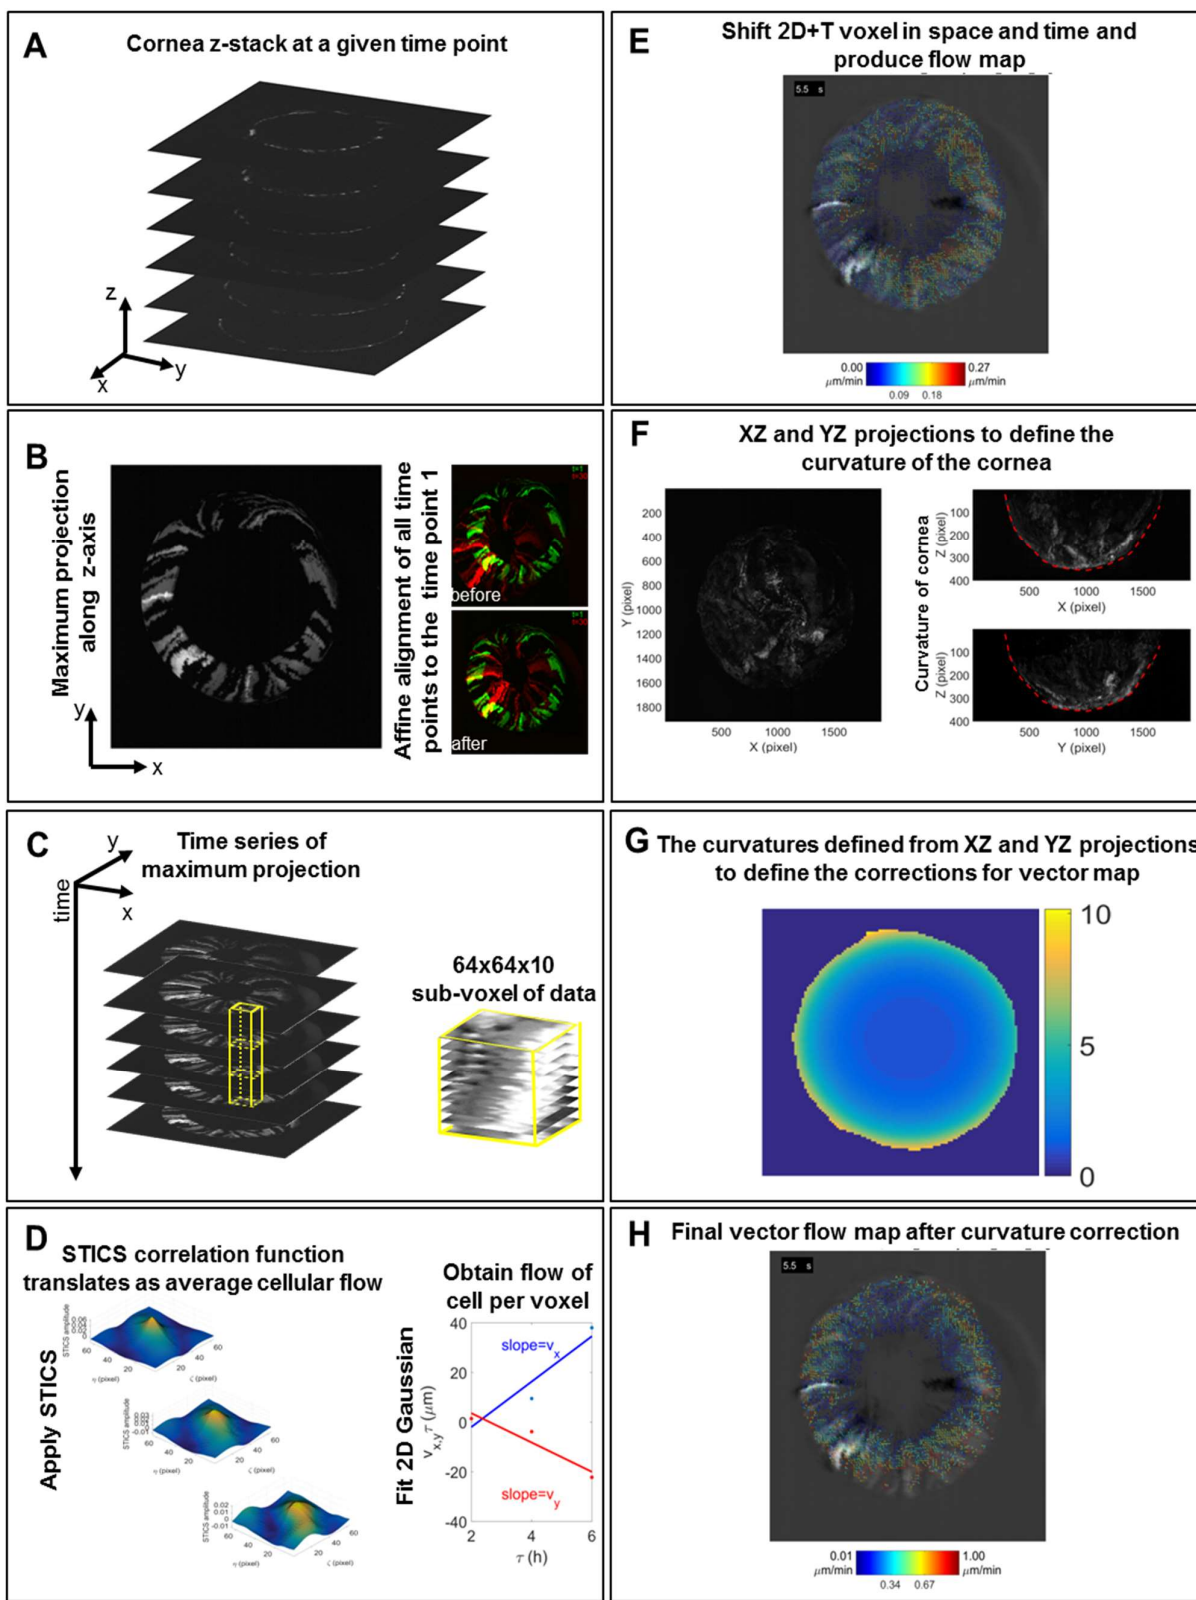

3

4

5

1 **Supplementary Figure Legend**

2 **Figure S1: Spatio-Temporal Image Correlation Spectroscopy (STICS) pipeline**

3 (A) Cornea Z-stacks were acquired every 2 hrs for 48 hrs from *ex vivo* organ-cultured corneas using light-sheet  
 4 microscopy. (B) The maximum intensity projection (MIP) was calculated along the Z-axis for every time point and  
 5 MIPs from all four channels were merged to produce a single gray-scale time series in the X-Y plane. Every time point  
 6 in the series was then aligned to the first time point. (C) STICS was applied on the registered time series of MIP; 64×64  
 7 pixels by 10 frames. (D) STICS correlation function was calculated using a fast fourier transform, and fitted by a 2D  
 8 Gaussian function at each time lag, and peak positions were further linear-fitted to extract the flow vector (velocities in  
 9 X and Y directions;  $v_x$ ,  $v_y$ ) for each voxel. (E) An example of full velocity vector map for an early time point. Blue to  
 10 red arrows indicate increase in velocity. (F) The cornea curvature is measured on X-Z and Y-Z projections of Z-stacks.  
 11 (G) The correction vector map is calculated from the curvature traces. (H) Correction map is multiplied to correct the  
 12 velocity map from (E) to account for the difference in clonal displacement along corneal curvature.

13

14 **Supplementary Tables**

15

16 **Table S1. Basal epithelial cell dimension and epithelial thickness adjacent the wound margin in 2 mm central**  
 17 **wounds, related to Figure 1B.**

| 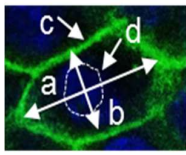 | Size of cells (axis; $\mu\text{m}$ ) |                | Perimeter ( $\mu\text{m}$ ) |               | Cell density<br>(425×425 $\mu\text{m}$ ) | Epithelial<br>thickness<br>( $\mu\text{m}$ ) |
|-------------------------------------------------------------------------------------|--------------------------------------|----------------|-----------------------------|---------------|------------------------------------------|----------------------------------------------|
|                                                                                     | Maximum<br>(a)                       | Minimum<br>(b) | Cell<br>(c)                 | Nuclei<br>(d) |                                          |                                              |
| <b>Wound</b>                                                                        | 15.5 ± 2.0                           | 10.3 ± 0.6     | 46.2 ± 5.1                  | 28.3 ± 2.4    | 1608.3 ± 444.6                           | 12.0 ± 0.7                                   |
| <b>Control</b>                                                                      | 11.5 ± 1.1                           | 7.1 ± 0.4      | 34.3 ± 2.6                  | 25.1 ± 1.9    | 3131.3 ± 593.2                           | 18.2 ± 0.8                                   |
| <b>p value</b>                                                                      | 0.0198<br>(*)                        | 0.0003 (***)   | 0.0113<br>(*)               | 0.15<br>(ns)  | 0.0117<br>(*)                            | <0.0001<br>(****)                            |

18 *Seven-wk-old WT mice had their right corneal epithelium debrided to create a 2 mm central wound. Average*  
 19 *measurement of each parameter was obtained from PFA-fixed and flat-mounted phalloidin-stained corneas at 16 hrs*  
 20 *post-injury by scanning confocal microscopy. Data represent mean ± SD, n=4/group, \* $p$ <0.05, \*\*\* $p$ < 0.001, \*\*\*\* $p$ <*  
 21 *0.0001, ns =  $p$ >0.05 using an unpaired two-tailed Welch's t-test.*

22

23

24

1 **Table S2. Average size of basal epithelial cells from simulated corneas, related to Figure 6 and Video 4.**

|                | Relative to cell area |                    |               |
|----------------|-----------------------|--------------------|---------------|
|                | Peripheral cells      | Intermediate cells | Central cells |
| <b>Wound</b>   | 1.04 ± 0.03           | 1.05 ± 0.03        | 1.04 ± 0.04   |
| <b>Control</b> | 1.0 ± 0.04            | 1.0 ± 0.05         | 1.0 ± 0.06    |
| <b>p value</b> | 0.0007 (***)          | 0.0006 (***)       | 0.0116 (*)    |

2 *The average size of the basal cells was significantly increased in the central region compared to peripheral and*  
 3 *intermediate zones Data represent mean ± SD, n=20/group, \*p<0.05, \*\*\*p< 0.001, \*\*\*\*p< 0.0001 by repeated*  
 4 *measures (2300 time unit) one-way ANOVA with Sidak multiple comparisons correction.*

5

## 6 **Supplementary Experimental Procedures**

### 7 **Histological assessment**

8 Mice were sacrificed by cervical dislocation at specific time points post-wounding. Eyes were enucleated, fixed in 10%  
 9 neutral buffered formalin overnight at room temperature (RT), then placed in 70% ethanol. Corneas were procured from  
 10 intact globes and bisected prior to embedding in agarose then paraffin; this ensured correct orientation relative to the  
 11 wound. Tissue sections (4 µm) were cut, dewaxed and rehydrated prior to staining with hematoxylin and eosin (H&E)  
 12 or periodic acid Schiff (PAS). They were mounted in DPX mounting medium (Sigma-Aldrich), observed under a BX51  
 13 light microscope (Olympus, Center Valley, PA), imaged on a digital camera (DP73; Olympus) and processed using  
 14 CellSens® (Olympus).

15

### 16 **Immunofluorescence**

17 To confirm the phenotype of the regenerated epithelium, mice were euthanized at specific time points post-wounding,  
 18 eyes were enucleated and fixed in 10% neutral buffered formalin, and corneas dissected and paraffin-embedded.  
 19 Antigen retrieval was performed by placing slides in Target Retrieval™ (Dako, Glostrup, Denmark) solution for 5 min  
 20 at 110°C in a NxGen® Decloaking Chamber (Biocare Medical, Pacheco, CA). Sections were equilibrated in Tris-  
 21 buffered saline (TBS, pH 7.6) then blocked in 20% goat or rabbit serum diluted in TBS containing 2% bovine serum  
 22 albumin (TBS-B) (Sigma-Aldrich) for 1 hr at RT. Next, they were incubated for 2 hrs at RT with a pre-determined  
 23 concentration of primary antibody (Ab) including goat anti-K12 (2 µg/ml; sc-17101; Santa Cruz, Dallas, TX), goat anti-  
 24 K13 (2 µg/ml; sc-31703; Santa Cruz), rabbit anti-K14 (1 µg/ml; GTX104124; GenTex, San Antonio, TX) and rat anti-  
 25 K8/18 (2 µg/ml; TROMA-I; DSHB, Iowa City, IA) in TBS-B. Abs to rabbit (Santa Cruz), goat (Santa Cruz) and rat  
 26 (Life Technologies, Carlsbad, CA) IgG were used as reagent negative controls. Sections were flooded with TBS to

1 remove unbound Abs, then reacted with Alexa-Fluor<sup>488</sup>-conjugated rabbit anti-goat, Alexa-Fluor<sup>647</sup>-conjugated chicken  
2 anti-rabbit or Alexa-Fluor<sup>488</sup>-conjugated goat anti-rat secondary Abs (Life Technologies) in TBS-B at a final  
3 concentration of 5 µg/ml for 45 mins at RT. Sections were mounted in ProLong Gold<sup>®</sup> anti-fade containing DAPI (Life  
4 Technologies), viewed under a BX51 fluorescence microscope (Olympus), images taken on a DP73 digital camera  
5 (Olympus) and processed using CellSens<sup>®</sup> (Olympus). For K12/K14 double-staining, images were acquired on a Zeiss  
6 780 confocal microscope (Carl Zeiss).

7

### 8 **Measuring clonal migration and wound closure by intra-vital microscopy**

9 Anaesthetized Confetti and WT mice were placed under a 3i VIVO<sup>™</sup> fluorescence microscope (Intelligent Imaging  
10 Innovations, Denver, CO), and wide-field images acquired using 4 filters compatible for CFP, GFP, YFP and RFP to  
11 record the status of the ocular surface prior to wounding; CFP 458 nm excitation, 464-495 nm emission; GFP 488 nm  
12 excitation, 497-510 nm emission; YFP 514 nm excitation, 517-540 nm emission; RFP 561 nm excitation, 575-654 nm  
13 emission. A droplet (25 µl) of 0.1% sodium fluorescein (Minims, iNova Pharmaceuticals, Sydney, Australia) was  
14 instilled for 5 sec, each eye was rinsed with 5 ml of PBS, then corneas imaged again. At selective time points, corneas  
15 were assessed by intravital microscopy using a 2.5×/0.085 detection lens, images were taken and processed using  
16 SlideBook v.6 (3i Intelligent Imaging Innovations, <https://www.intelligent-imaging.com>) and ImageJ software (NIH,  
17 <https://imagej.nih.gov/ij>) (Abràmoff et al., 2004; Cruzat et al., 2011). Wound closure rate was estimated from  
18 measurements taken after applying fluorescein. Clonal migration in Confetti mice was estimated by measuring the  
19 length of 5 or more limbal-originating streaks of each color over time, and the rate expressed as µm/hr (Di Girolamo et  
20 al., 2015; Lobo et al., 2016; Richardson et al., 2017). At least 3 mice were used per group/time point. Due to the  
21 elevated K14<sup>+</sup> clonal migration during wound-healing and due to the limited amount of ketamine animals could endure  
22 over this period, two groups of mice were established in which the monitoring period was offset. Live Confetti mice in  
23 Group 1 were inspected at 0 hrs, 8 hrs, 24 hrs and 72 hrs, and those in Group 2 at 0 hrs, 16 hrs, 48 hrs and 72 hrs post-  
24 injury.

25

### 26 **Confocal microscopy**

27 Confetti transgenic mice were euthanized at designated time points post-wounding, eyes were enucleated, fixed in 4%  
28 paraformaldehyde overnight at 4°C, then placed in PBS prior to experimentation. Corneas were procured, extraneous  
29 tissues (lens, iris, retina and ocular muscles) removed and imaged by confocal fluorescence microscopy (Zeiss LSM  
30 780; Carl Zeiss) with a 20×/0.8 or 100×/1.4 detection lens. The four fluorescent protein signatures were collected  
31 sequentially as follows; CFP 458 nm excitation, 455-499 nm emission; GFP 488 nm excitation, 490-508 nm emission;  
32 YFP 514 nm excitation, 517-544 nm emission; RFP 561 nm excitation, 579-659 nm emission. Four relaxing radial

1 incisions were made on the corneas to facilitate flat-mounting. Corneas were placed epithelial side-down on glass slides,  
2 mounted in ProLong Gold<sup>®</sup> anti-fade reagent containing DAPI (Life Technologies), weighted overnight to facilitate  
3 flattening, and imaged using a Zeiss 780 confocal microscope (Carl Zeiss). To capture the entire sample, 121 frames  
4 were merged into a single 11×11 tiled image. Z-stack images were collected, merged using a maximum intensity  
5 projection with Zen (Carl Zeiss), then analyzed with ImageJ software. The number of fluorescent stripes was  
6 determined by manually counting each as they emerged from limbal margin. Clone width at the periphery was  
7 estimated (using a scale bar as a reference) from at least 10 fluorescent streaks comprising YFP and RFP (Richardson et  
8 al., 2017).

9

### 10 **Spatio-Temporal Image Correlation Spectroscopy of clonal migration in *ex vivo* wounded corneas**

11 As an alternative and more accurate means of measuring cell movement, Spatio-Temporal Image Correlation  
12 Spectroscopy (STICS) (Toplak et al., 2012; Meddens et al., 2016; Ashdown et al., 2017) was applied on a series of 2D  
13 maximum intensity projections of 3D image stacks that were acquired via light-sheet microscopy (Zeiss Lightsheet Z.1;  
14 Carl Zeiss, Jena, Germany) at different time points post-injury in *ex vivo* organ-cultured murine corneas. The raw data  
15 consisted of a temporal sequence (i.e. time point per 2 hrs) of Z-stacks from corneas imaged through a 5×/0.16 detection  
16 lens and 5×/0.1 illumination lens (pixel size 2.28 μm). The four fluorescent protein signatures were collected  
17 sequentially as follows; CFP 445 nm excitation, 460-500 nm emission; GFP 488 nm excitation, 505-545 nm emission;  
18 YFP 514 nm excitation, 525-545 nm emission; RFP 561 nm excitation, 575-654 nm emission. Z-stack images were  
19 collected with an optimal sectioning step of 4.35 μm (proximally 550 slices). For every time point (Figure S1A), the  
20 maximum intensity projection image was calculated along the Z-axis (Figure S1B). Although the data was acquired in  
21 four channels, all intensities were combined to produce a single grayscale time series of maximum projection images in  
22 the X-Y plane (Figure S1C). Image registration (Figure S1B; images superimposed) was performed using image cross-  
23 correlation; this ensured alignment of every frame in the series to the first. STICS was then applied on the registered  
24 maximum intensity projection time series, where the local region of interest was set to 64×64 pixels by 10 frames  
25 (Figure S1C; data sub-voxel). Registered image series were Fourier filtered to exclude immobile components as  
26 previously described (Toplak et al., 2012). For each voxel of data, STICS correlation function (CF) was calculated  
27 (Figure S1C, 3 temporal lags CF; yellow colored rectangular prism). CF is the fit with a 2D Gaussian function at each  
28 temporal lag, and the peak positions were further fitted to extract the flow vector ( $v_x$ ,  $v_y$ ) for each voxel (Figure S1D).  
29 The spatial shift of 16 pixels in X and Y plane ensured over-sampling between adjacent regions which was used to filter  
30 out erroneous flows. Briefly, the mean of 8 nearest neighbouring region speeds were compared to the central region  
31 value and if outside the variance of the neighbourhood, the value was set to a not-a-number. To achieve the temporal  
32 evolution of flow-map, 10 frames at a time were analyzed and the temporal block of images shifted by 1 frame (2 hrs)

1 to ensure continuous transition in flow per region of interest, and to also account for possible change in local flow  
2 during the experiment. The resulting vector flow-map was obtained as result of spatio-temporal shift of data sub-voxel  
3 (Figure S1E). Furthermore, to account for the 3D cellular movement on the surface of cornea, its curvature was  
4 measured on the X-Z and Y-Z projections of the Z-stack (Figure S1F, red hatched lines). From the curvature traces, the  
5 correction map was calculated (Figure S1G) which was used to correct the flow-map obtained from maximum  
6 projections in X-Y plane (Figure S1E); this was subsequently converted into a vector flow-map of cells produced from  
7 the movement on the curved surface defined by the cornea (Figure S1H). The corrected spatio-temporally resolved  
8 vector flow-maps were further analyzed by combining the speed of cells at the leading edge of the wound, and their  
9 histograms compared to those obtained for speed in the peripheral region. These analyses were conducted in custom  
10 built software MATLAB (MathWorks, Natick, MA).

11

## 12 **Overview, design concepts and details of the mathematical model**

### 13 ***1. Purpose***

14 The model is used to investigate the role that population pressure-driven motility plays in corneal wounding and repair  
15 and to compare spatial distributions of clonally related cells in corneas, following cases of no wounding and wounding  
16 in a central circular format. It is based on a previous model (Grimm et al., 2010; Lobo et al., 2016).

17

### 18 ***2. Entities, state variables and scales***

19 The model space is a circular region representing the cornea and adjacent limbus, which collectively is in one of three  
20 states: a 'healthy state', an 'early wounded state' and a 'late wounded state'. The healthy state represents a cornea  
21 whose dynamics do not incorporate any wound, or any active response to previous wounding. The early wounded state  
22 represents a cornea that is undergoing repair, where the key driver of wound repair is cell movement into the vacant  
23 wounded area, before the wound approaches closure. The late wounded state represents a cornea that has almost  
24 transitioned into the healthy state, where the key component of wound repair is cells coming together spatially, which  
25 results in wound closure.

26

27 Regardless of collective state of the cornea, the model consists of approximately 4,000 cells within the basal layer  
28 inside a circular perimeter with a diameter of 115 idealized cell radii (defined below in '5. Initialization'). Each cell has  
29 the following attributes or state variables:

- 30 1. Position: The position of a cell is determined by a single pair of co-ordinates, as we ignore the curvature of the  
31 basal layer of the cornea. Collectively, the set of cell positions is used to determine the edges and vertices of cells,

- 1 using geometric structures known as Voronoi diagrams. We assume the limbus consists exclusively of stem cells,  
 2 which are all within a single cell rim, a fixed distance away from the center of the corneal region.
- 3 2. Lineage identification: Each stem cell is endowed with a distinct lineage identification code, and all future  
 4 progeny of that stem cell in the cornea share the same cell lineage identification code.
- 5 3. Age: Cells are attributed with a current age. Processes such as time to cell death, symmetric cell division and  
 6 differentiation off the basal layer are assumed to occur approximately periodically.
- 7 4. Type: Each cell is characterized by a type that is used to reflect the phenotypic behavior of cells in the cornea, or  
 8 to maintain the model. Cell types include: Ghost cells, whose position is exterior to the circular region that  
 9 represents the cornea, and are designed to play no active part in corneal dynamics, but are necessary to maintain the  
 10 spatial structure of the model; Blank cells, that represent wounded areas inside the circular region that are not  
 11 occupied by other cell types; epithelial stem cells that represent the phenotypic properties of stem cells found in the  
 12 limbus otherwise known as LESC; and TACs within the cornea. An injury transforms cells in the wounded area  
 13 from TAC cells into Blank cells and moves the cornea from a healthy state to an early wounded state.
- 14 5. Cell types Blanks, LESC and TAC differ in the following way depending on the collective state:
- 15 5.1. Healthy state

|                       | <b>Blank</b> <sup>a</sup> | <b>LESC</b>                        | <b>TAC</b>                        |
|-----------------------|---------------------------|------------------------------------|-----------------------------------|
| Lifespan              | n/a                       | Normally distributed $N(3000, 10)$ | Normally distributed $N(300, 10)$ |
| Replicative capacity  | n/a                       | $\infty^b$                         | TAC(max) = 3 <sup>c</sup>         |
| Replicative Frequency | n/a                       | $R^{*d}$                           | $N(300, 10)^e$                    |

- 16
- 17 a) Blank cells are not present in the healthy state
- 18 b) LESC; are assumed to have a replicative capacity that is much greater than the time scale represented by the  
 19 model and are therefore characterized by limitless replicative potential for both symmetric and asymmetric  
 20 proliferation in the model. LESC; are assumed to replicate symmetrically, producing two LESC; or  
 21 asymmetrically, producing an LESC; and a TAC
- 22 c) TAC; can divide asymmetrically to produce another TAC and a TDC. TDC; do not contribute to the basal layer  
 23 and are not depicted in simulations. TAC; have a limited number of rounds of symmetric cell division, known as  
 24 TAC(max), after which they divide symmetrically to produce two TDC;.



d) The value of  $R^*$ , the replicative rate of LESC's are chosen to maintain equilibrium in cell population over time. This is determined by the model parameters and depends on the other parameters listed above.

e) At the end of their lifespan, TAC( $n$ ) cells divide symmetrically to produce two TAC( $n-1$ ) cells when  $n > 1$ , or two TDC cells when  $n = 1$ .

## 5.2 Early and late wounded state

|                       | <b>Blank</b>                                           | <b>LESC</b>                        | <b>TAC</b>                        |
|-----------------------|--------------------------------------------------------|------------------------------------|-----------------------------------|
| Lifespan              | Dependent on properties of the Blank cell <sup>a</sup> | Normally distributed $N(3000, 10)$ | Normally distributed $N(300, 10)$ |
| Replicative capacity  | None                                                   | $\infty$                           | TAC(max) = 3                      |
| Replicative Frequency | n/a                                                    | $2.5R^*$ <sup>b</sup>              | $N(300, 10)$                      |

a) In the early wounded state, cells in the circular region more effectively push into Blank cells than other cells in the cornea. This represents the preference for cells to move into unoccupied wounded areas of the cornea over competing for space with other cells. Blank cells remain in the cornea and may occupy less of the basal layer, but they are not yet removed. In the late wounded state, Blank cells are removed as follows:

b) Blank cells are further classified as internal Blank cells, which are only adjacent to other Blank cells, and edge Blank cells, which are adjacent to at least one TAC cell.

- When the distance between two internal Blank cells is small enough (less than 0.15 idealized cell radii), they are replaced by a single Blank cell whose position takes the value of the average position of the two internal cells being replaced

- The cornea moves from an early wounded state to a late wounded state when there are more edge Blank cells than internal Blank cells. When the cornea is in the late wounded state, Blank cells are removed stochastically with  $p = 0.2$  per Blank cell per time step, and are not replaced.

c) LESC's have a 2.5-fold increase in proliferation as a response to wounding.

### 3. Processes overview and scheduling

At each step, the following processes occur in this order:

- 1 1. Cell motility
- 2 2. Possible wounding and changing the collective state to one of healthy, early wounding or late wounding
- 3 3. Remove Blank cells if in late wounding state
- 4 4. Render and record the state of the simulation
- 5 5. Cell division of LESC
- 6 6. Differentiation off the basal layer
- 7 7. Cell division of TACs

8

#### 9 **4. Design Concepts**

- 10 1. Basic principles: We make the following assumptions
  - 11 a) The cornea is in a state of homeostasis, conforming with the X, Y, Z hypothesis (Thoft and Friend, 1983).
  - 12 b) The cell lineage pathways in the cornea are LESC-TAC-TDC
  - 13 c) There is a fixed population of LESC in the limbus
  - 14 d) The cells in the cornea are motile
  - 15 e) The population pressure is related to the density of neighboring cells
  - 16 f) Cells respond to pressure gradients by moving from higher pressure to lower pressure areas.
  - 17 g) TAC cells preferentially move to the direction of an adjacent Blank cell rather than other TACs or LESC.
- 18 2. Emergence: the spatial structures of cell lineages in the cornea emerge through passive motility rules, driven by a  
19 cellular spring network.
- 20 3. Adaptation: cells in the cornea move in response to the pressure exerted by their immediate neighbors and either  
21 replicate or die in response to reaching their lifespan; LESC respond to the death of a neighbor by replicating  
22 themselves; these responses do not adapt over time or in response to position.
- 23 4. Objectives: the cells do not aim to meet any objectives.
- 24 5. Learning: individual cells do not change their adaptive traits over time in response to experience.
- 25 6. Prediction: there are no adaptive traits in the model, so the agents in the model do not make any predictions.
- 26 7. Sensing: cells can sense the pressure exerted by their neighbors and whether they are located in the limbus or the  
27 cornea. Blank cells can sense whether their neighbors are TACs or other Blank cells.
- 28 8. Interaction: cells respond to the local configurations of other cells by moving in response to a pressure gradient  
29 or, in the case of LESC, replicating in response to the death of a neighbor.

1 9. Stochasticity: the lifespans of cells are normally distributed for both LESC and TACs. The other source of  
2 stochasticity in the model occurs when a neighboring LESC is elected to undergo symmetric cell division in  
3 response to the removal (death) of a LESC.

4 10. Collectives: there is no pre-determined collective behavior in the model.

5 11. Observation: position, lineage identification code, age and proliferative capacity are recorded for all cells in the  
6 model at every time step.

7

## 8 **5. Initialization**

9 Cell positions are initially chosen so that the Voronoi diagram generated is a regular hexagonal grid (the distance  
10 between the positions of neighboring cells is a constant,  $s$ , known as the idealized cell diameter). All LESC are given a  
11 random age (uniformly distributed from 0 to their lifespan) and a unique cell lineage identification code. Initially, all  
12 TACs are not assigned a lineage identification code. TACs derived from LESC after initialization inherit the lineage  
13 identification code of their parent cell. Cell types are chosen such that LESC have only two adjacent LESC neighbors,  
14 and that TACs that have less proliferative capacity are placed towards the center of the cornea. The model is run for  
15 2000 pre-simulation time steps to achieve homeostasis. At this point, all cells have acquired a lineage identification  
16 code, and a stable spoke-like pattern has been achieved, and the simulation begins.

17

## 18 **6. Input**

19 There are no external input data that alter the model during the simulations.

20

## 21 **7. Sub-models**

22 Cell motility in response to pressure: the cell positions of all TACs are updated through a cell movement rule, which is  
23 applied 100 times per time step. Each time the movement rule is applied, the set of Voronoi neighbors (found through  
24 Delaunay Triangulation) is found, and cell movement arising from pressure between a TAC neighboring cell is  
25 proportional to the  $d_p \cdot s_t$ , where  $d_p$  represents the distance between the cell neighbors, and  $s_t$  varies depending on the  
26 types of cells that are neighbors as follows:

27

28

| Cell type | Neighboring cell type | $S_t$ |
|-----------|-----------------------|-------|
|-----------|-----------------------|-------|

|               |               |            |
|---------------|---------------|------------|
| LESCs or TACs | LESCs or TACs | $s^a$      |
| TACs          | Blank         | $0.95 s^b$ |
| Blank         | TACs          | $1.05s^b$  |
| Blank         | Blank         | $s_b^c$    |

1

2 a)  $s$  is the idealized cell diameter

3 b) TACs preferentially move towards vacant areas of the cornea, and Blank cells in the wounded area move away from  
4 this advancing frontier

5 c)  $s_b$  is determined dynamically to be the average Blank cell diameter that covers the current area of wound

6

7 The total movement of a cell is the sum of all movements arising from each pair of neighbors, and this is done  
8 synchronously. The positions of both LESCs and Ghosts are fixed.

9 1. Cell motility: Cell positions are updated through the following movement rule which is applied 100 times per  
10 time step

$$11 \quad \Delta p_i = \frac{1}{2\sqrt{3}} \sum_j w_{i,j} (p_i - p_j) (s_t - |p_i - p_j|) / |p_i - p_j|$$

12 2. Render and record the state of the simulation, collect all figures and data.

13 3. Age cells: All cells are assumed to age synchronously.

14 4. LESCs that have reached their lifespan are removed and are synchronously replaced by symmetric proliferation of  
15 a neighboring LESC, which is chosen at random. The cell lineage identification of the new cell matches that of the  
16 mother cell, and the lifespan of the new cell is chosen randomly from  $N(3000, 10)$ .

17 5. LESCs give rise to TAC(max)s at a rate designed to maintain corneal equilibrium. Newly proliferated TACs share  
18 the lineage identification of the mother cell, its position is  $0.5s$  closer to the center of the cornea than the mother cell,  
19 and the lifespan of the TAC(max) is chosen randomly from  $N(75, 25)$ . While the cornea is wounded, this rate is  
20 increased 2.5-fold.

21 6. When  $s_b^c < 0.15s$ , Blank cells are considered to be sufficiently small, are completely surrounded by other Blank  
22 cells (known as internal Blank cells) and are deemed to be available for removal. Blank cells that are within  $0.25s$  to  
23 another Blank cell are removed leaving a singular, larger Blank cell. When there are no internal Blank cells, the  
24 remaining Blank cells are removed stochastically with  $p = 0.2$  per Blank cell per time step.

25 7. Cell differentiation off the basal layer: TACs that have reached their lifespan and exhausted their replicative

1 potential die by becoming TDCs in the suprabasal layers of the epithelium and are removed from the model.

2 8. Symmetric division of a TAC with  $x$  rounds of cell division remaining produces two daughter TACs, both having  
3  $x-1$  potential rounds of cell division remaining. Both these daughter cells share the lineage identification code as the  
4 mother cell and are placed within 0.5s of the position of the mother cell, with no other predetermined spatial  
5 assignment.

6

## 7 **Supplementary References**

8 Abramoff, M.D., Magalhães, P.J., and Ram, S.J. (2004). Image processing with ImageJ. *Biophotonics international* 11,  
9 36-42.

10 Ashdown, G.W., Burn, G.L., Williamson, D.J., Pandžić, E., Peters, R., Holden, M., Ewers, H., Shao, L., Wiseman, P.W.,  
11 and Owen, D.M. (2017). Live-cell super-resolution reveals F-actin and plasma membrane dynamics at the T cell  
12 synapse. *Biophysical journal* 112, 1703-1713.

13 Cruzat, A., Witkin, D., Baniasadi, N., Zheng, L., Ciolino, J.B., Jurkunas, U.V., Chodosh, J., Pavan-Langston, D., Dana,  
14 R., and Hamrah, P. (2011). Inflammation and the nervous system: the connection in the cornea in patients with  
15 infectious keratitis. *Investigative ophthalmology & visual science* 52, 5136-5143.

16 Di Girolamo, N., Bobba, S., Raviraj, V., Delic, N., Slapetova, I., Nicovich, P., Halliday, G., Wakefield, D., Whan, R.,  
17 and Lyons, J. (2015). Tracing the fate of limbal epithelial progenitor cells in the murine cornea. *Stem cells* 33, 157-169.

18 Grimm, V., Berger, U., DeAngelis, D.L., Polhill, J.G., Giske, J., and Railsback, S.F. (2010). The ODD protocol: a  
19 review and first update. *Ecological modelling* 221, 2760-2768.

20 Lobo, E.P., Delic, N.C., Richardson, A., Raviraj, V., Halliday, G.M., Di Girolamo, N., Myerscough, M.R., and Lyons,  
21 J.G. (2016). Self-organized centripetal movement of corneal epithelium in the absence of external cues. *Nature*  
22 *communications* 7.

23 Meddens, M.B., Pandzic, E., Slotman, J.A., Guillet, D., Joosten, B., Mennens, S., Paardekooper, L.M., Houtsmuller,  
24 A.B., Van Den Dries, K., and Wiseman, P.W. (2016). Actomyosin-dependent dynamic spatial patterns of cytoskeletal  
25 components drive mesoscale podosome organization. *Nature communications* 7.

26 Richardson, A., Lobo, E.P., Delic, N.C., Myerscough, M.R., Lyons, J.G., Wakefield, D., and Di Girolamo, N. (2017).  
27 Keratin-14-Positive Precursor Cells Spawn a Population of Migratory Corneal Epithelia that Maintain Tissue Mass  
28 throughout Life. *Stem Cell Reports* 9, 1081-1096.

29 Thoft, R.A., and Friend, J. (1983). The X, Y, Z hypothesis of corneal epithelial maintenance. *Investigative*  
30 *ophthalmology & visual science* 24, 1442-1443.

- 1 Toplak, T., Pandzic, E., Chen, L., Vicente-Manzanares, M., Horwitz, A.R., and Wiseman, P.W. (2012). STICCS reveals
- 2 matrix-dependent adhesion slipping and gripping in migrating cells. *Biophysical journal* *103*, 1672-1682.
